# Supplementary material for: Microbial Keratitis in Nepal: Predicting the Microbial Aetiology from Clinical Features
Source: MDPI journal article supplement (doi:10.3390/jof8020201), 2022-02-19
Supplement: s1 [file s1]

## Supplementary Material

**Supplementary Figure S1: Operating characteristic curve showing probability of fungal infection at different scores (mixed infections excluded). (95% CI dashed lines)**

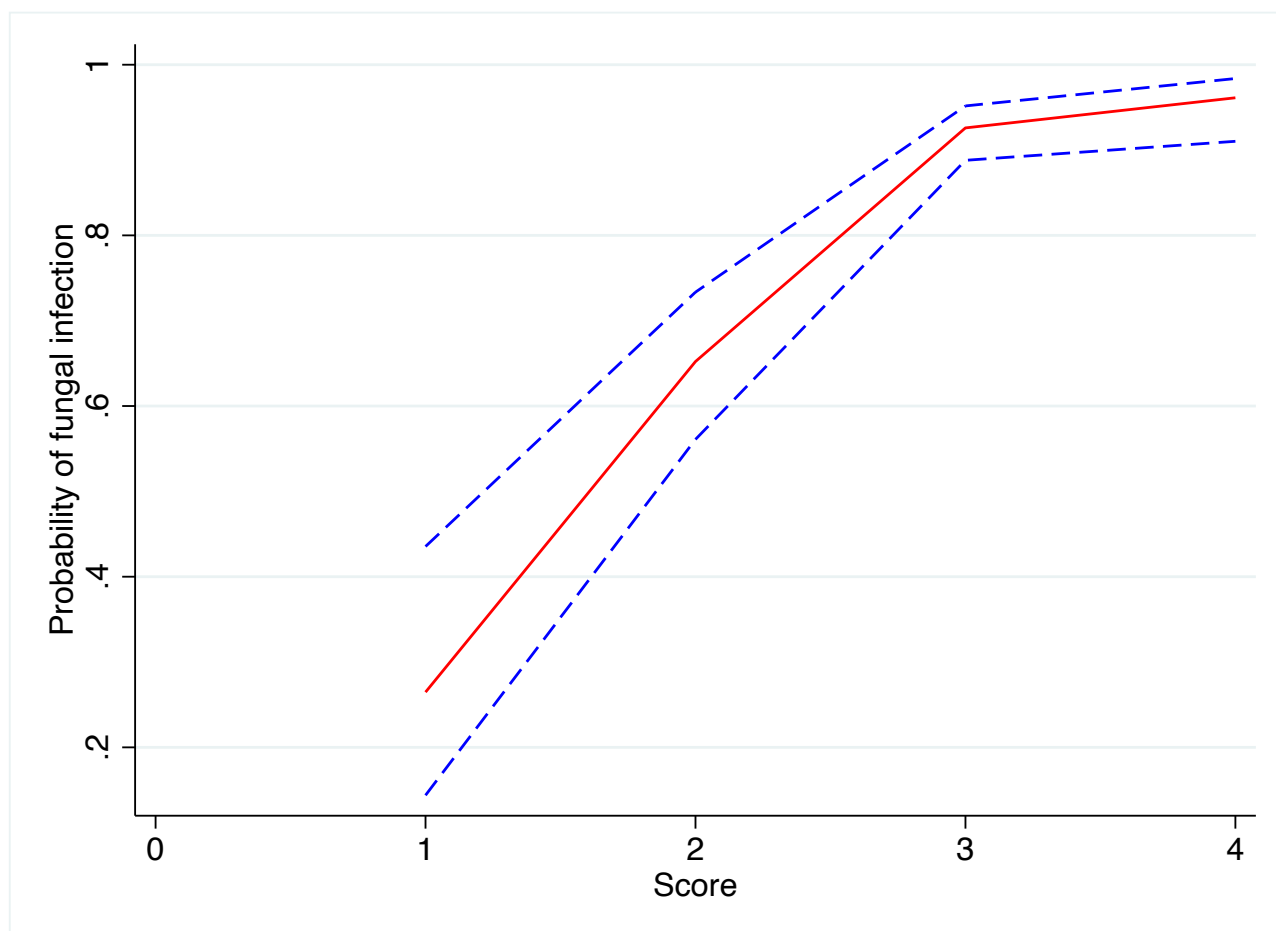

**Supplementary Table S1: Reasons for exclusion of potential participants from the study**

| Reason                          | n/247 | Percent |
|---------------------------------|-------|---------|
| Did not consent                 | 135   | 54.7%   |
| Healed or chronic ulcer         | 55    | 22.3%   |
| Epithelial defect less than 1mm | 40    | 16.2%   |
| Aged less than 18 years         | 10    | 4.0%    |
| Presented out-of-hours          | 5     | 2.0%    |
| Clinically viral keratitis      | 1     | 0.4%    |
| Mooren's keratitis              | 1     | 0.4%    |

**Supplementary Table S2: Univariable analysis for features associated with fungal keratitis (mixed infections excluded).**

|                               | Odds Ratio | p-value | 95% CI     | Sens  | Spec  | PPV   | NPV   |
|-------------------------------|------------|---------|------------|-------|-------|-------|-------|
| Serrated margins              | 12.74      | <0.001  | 7.41 21.90 | 94.2% | 44.1% | 89.1% | 60.8% |
| Fibrin                        | 1.13       | 0.784   | 0.46 2.79  | 7.3%  | 93.5% | 84.6% | 17.1% |
| Hypopyon                      | 0.63       | 0.037   | 0.40 0.97  | 26.1% | 63.9% | 76.8% | 15.9% |
| Raised slough                 | 6.55       | <0.001  | 4.20 10.20 | 82.5% | 58.2% | 90.0% | 42.1% |
| Satellite lesions             | 2.29       | 0.001   | 1.38 3.81  | 39.3% | 78.0% | 89.1% | 22.0% |
| Pigmented colour              | 1.87       | 0.313   | 0.55 6.31  | 5.0%  | 97.3% | 89.3% | 18.3% |
| Nasolacrimal duct obstruction | 0.13       | <0.001  | 0.06 0.28  | 2.8%  | 81.8% | 41.9% | 15.3% |
| Reduced corneal sensation     | 0.67       | 0.153   | 0.39 1.16  | 12.9% | 81.8% | 76.5% | 17.1% |
| Trauma with vegetative object | 2.19       | 0.003   | 1.31 3.65  | 34.1% | 80.9% | 89.1% | 21.2% |
| Previous antibiotics          | 1.76       | 0.011   | 1.14 2.73  | 75.5% | 36.4% | 84.4% | 24.5% |
| Delayed presentation > 3 days | 1.65       | 0.066   | 0.97 2.82  | 86.9% | 20.0% | 83.2% | 25.0% |
| Previous steroids             | 2.45       | 0.015   | 1.19 5.03  | 17.9% | 91.8% | 90.9% | 19.7% |

**Supplementary Table S3: Multivariable analysis of clinical features occurring in fungal and bacterial keratitis (mixed infections excluded)**

|                               | Odds Ratio | p-value | 95% CI     |
|-------------------------------|------------|---------|------------|
| Serrated margins              | 7.32       | <0.001  | 3.95 13.58 |
| Raised slough                 | 4.52       | <0.001  | 2.64 7.72  |
| Nasolacrimal duct obstruction | 0.15       | <0.001  | 0.06 0.38  |
| Trauma with vegetative object | 2.84       | 0.006   | 1.40 5.76  |

**Supplementary Table S4: Screening test indices for each score (mixed infections excluded)**

|          | Sens  | Spec  | PPV   | NPV   |
|----------|-------|-------|-------|-------|
| Score >0 | 100%  | 2.17% | 83.6% | 100%  |
| Score >1 | 98%   | 29.3% | 87.4% | 75%   |
| Score >2 | 81.7% | 72.8% | 93.7% | 44.4% |
| Score >3 | 27.1% | 94.6% | 96.1% | 20.7% |

**Supplementary Table S5: Clinical features occurring in dematiaceous, *Fusarium* spp., and *Aspergillus* spp. keratitis, and univariable analysis for features associated with dematiaceous fungal keratitis.**

|                               |                           |      |                              |      |                                 |     | Indices for detecting dematiaceous fungal keratitis |         |        |       |       |       |       |       |
|-------------------------------|---------------------------|------|------------------------------|------|---------------------------------|-----|-----------------------------------------------------|---------|--------|-------|-------|-------|-------|-------|
|                               | Frequency<br>dematiaceous | (%)  | Frequency<br><i>Fusarium</i> | (%)  | Frequency<br><i>Aspergillus</i> | (%) | Odds<br>Ratio                                       | p-value | 95% CI |       | Sens  | Spec  | PPV   | NPV   |
| Serrated margins              | 207/212                   | 98%  | 57/60                        | 95%  | 48/54                           | 89% | 2.68                                                | 0.073   | 0.91   | 7.86  | 97.6% | 6.1%  | 54.9% | 68.8% |
| Fibrin                        | 10/195                    | 5.1% | 6/54                         | 11%  | 3/43                            | 7%  | 0.52                                                | 0.117   | 0.22   | 1.18  | 5.1%  | 90.5% | 40.0% | 43.6% |
| Hypopyon                      | 55/208                    | 26%  | 20/61                        | 33%  | 19/54                           | 35% | 0.85                                                | 0.479   | 0.55   | 1.33  | 26.4% | 70.3% | 50.5% | 45.6% |
| Raised slough                 | 196/212                   | 92%  | 53/64                        | 83%  | 42/54                           | 78% | 2.76                                                | 0.002   | 1.47   | 5.18  | 92.5% | 18.4% | 56.5% | 68.0% |
| Satellite lesions             | 71/196                    | 36%  | 28/58                        | 48%  | 24/49                           | 49% | 0.65                                                | 0.045   | 0.43   | 0.99  | 36.2% | 53.3% | 48.0% | 41.3% |
| Pigmented colour              | 23/212                    | 11%  | 1/64                         | 1.6% | 0/54                            | 0%  | 7.38                                                | 0.001   | 2.18   | 25.01 | 10.8% | 98.4% | 88.5% | 49.1% |
| Nasolacrimal duct obstruction | 3/192                     | 1.6% | 0/62                         | 0%   | 0/49                            | 0%  | 0.53                                                | 0.390   | 0.12   | 2.25  | 1.6%  | 97.1% | 37.5% | 46.9% |
| Reduced corneal sensation     | 17/212                    | 8%   | 11/64                        | 17%  | 8/54                            | 15% | 0.47                                                | 0.019   | 0.25   | 0.88  | 8.0%  | 84.3% | 37.0% | 44.4% |
| Trauma with vegetative object | 68/212                    | 32%  | 16/64                        | 25%  | 11/54                           | 20% | 1.09                                                | 0.699   | 0.71   | 1.67  | 32.1% | 69.7% | 54.8% | 47.3% |
| Previous antibiotics          | 152/212                   | 73%  | 50/64                        | 78%  | 41/54                           | 76% | 0.82                                                | 0.404   | 0.52   | 1.30  | 73.1% | 23.2% | 52.2% | 43.0% |
| Delayed presentation > 3 days | 193/212                   | 91%  | 51/64                        | 80%  | 48/54                           | 89% | 1.51                                                | 0.202   | 0.80   | 2.86  | 91.0% | 13.0% | 54.5% | 55.8% |
| Previous steroids             | 39/212                    | 18%  | 12/64                        | 19%  | 13/54                           | 24% | 2.45                                                | 0.015   | 1.19   | 5.03  | 18.4% | 76.8% | 47.6% | 45.1% |

There were no clinical features found to be significantly associated with *Fusarium* or *Aspergillus* keratitis in our sample.

**Supplementary Table S6: Multivariable analysis of clinical features occurring in dematiaceous fungal keratitis**

|                           | Odds Ratio | p-value | 95% CI |      |
|---------------------------|------------|---------|--------|------|
| Raised slough             | 2.78       | 0.016   | 1.21   | 6.38 |
| Satellite lesions present | 0.58       | 0.022   | 0.37   | 0.92 |
| Pigmented colour          | 7.54       | 0.002   | 2.11   | 26.9 |
| Fibrin                    | 0.38       | 0.039   | 0.15   | 0.95 |
